# Supplementary material for: Rapid multiplex MinION nanopore sequencing workflow for Influenza A viruses
Source: Springer Nature journal article supplement (doi:10.1186/s12879-020-05367-y), 2020-09-03

## Additional File 1 - Rapid Multiplex MinION Nanopore Sequencing Workflow for Influenza A Viruses

**TABLE S1** Metrics of MinION and IonTorrent sequencing of twelve influenza reference samples, four human IAV samples and two avian IAV swab samples.

| Sample information |         | ONT MinION |           |                 |                  |                   | IonTorrent S5 |           |                 |                  |                   |
|--------------------|---------|------------|-----------|-----------------|------------------|-------------------|---------------|-----------|-----------------|------------------|-------------------|
| Sample ID          | Subtype | Barcode    | No. reads | No. nucleotides | Mean read length | Mean read quality | Barcode       | No. reads | No. nucleotides | Mean read length | Mean read quality |
| R30-06             | H1N1    | RBK_01     | 135,319   | 76,779,158      | 567              | 12.4              | IonXpress_001 | 979,254   | 263,435,070     | 269              | 27.5              |
| R3111-07           | H2N9    | RBK_02     | 124,950   | 57,837,095      | 463              | 12.3              | IonXpress_002 | 789,774   | 219,019,649     | 277              | 27.3              |
| R2555-06           | H3N1    | RBK_03     | 127,224   | 47,715,460      | 375              | 12.4              | IonXpress_005 | 896,250   | 249,270,903     | 278              | 26.8              |
| HAIV-81            | H4N6    | RBK_04     | 184,108   | 97,179,395      | 528              | 12.4              | IonXpress_006 | 945,428   | 255,182,523     | 269              | 27.2              |
| R1612-08           | H5N3    | RBK_05     | 154,055   | 58,279,146      | 378              | 12.3              | IonXpress_007 | 1,141,716 | 319,299,737     | 279              | 26.8              |
| R617-07            | H6N2    | RBK_06     | 155,749   | 66,775,697      | 429              | 12.5              | IonXpress_008 | 584,795   | 166,306,709     | 284              | 26.6              |
| R11-01             | H7N7    | RBK_07     | 171,932   | 73,404,138      | 427              | 12.3              | IonXpress_010 | 911,348   | 245,062,731     | 268              | 27.2              |
| R249-08            | H9N2    | RBK_08     | 127,146   | 47,167,977      | 371              | 12.5              | IonXpress_011 | 991,208   | 272,905,748     | 275              | 26.9              |
| WV1677-03          | H10N4   | RBK_09     | 149,147   | 61,256,718      | 411              | 12.5              | IonXpress_012 | 988,573   | 278,693,189     | 281              | 26.9              |
| R2675-06           | H11N6   | RBK_10     | 89,162    | 40,107,611      | 450              | 12.6              | IonXpress_013 | 940,860   | 261,449,754     | 277              | 27.1              |
| R2613-06           | H13N8   | RBK_11     | 192,947   | 101,885,364     | 528              | 12.4              | IonXpress_014 | 1,038,855 | 294,774,287     | 283              | 27.2              |
| Se-99              | H16N3   | RBK_12     | 56,207    | 27,001,365      | 480              | 12.5              | IonXpress_015 | 988,802   | 266,418,429     | 269              | 27.2              |
| FM-47              | H1N1    | RBK_04     | 312,507   | 171,295,702     | 548              | 12.3              | NA            | NA        | NA              | NA               | NA                |
| R1541-07           | H1N1    | RBK_05     | 310,449   | 187,350,645     | 603              | 12.4              | NA            | NA        | NA              | NA               | NA                |
| H1N1-sw1           | H1pdmN1 | RBK_06     | 308,631   | 197,777,138     | 640              | 12.2              | NA            | NA        | NA              | NA               | NA                |
| AR3343-17          | H1pdmN1 | RBK_07     | 390,993   | 234,193,266     | 599              | 12.5              | NA            | NA        | NA              | NA               | NA                |
| AR780-17           | H5N5    | RBK_10     | 15,402    | 9,615,096       | 624              | 12.5              | IonXpress_089 | 426,862   | 127,641,921     | 299              | 27.3              |
| AR1384-17          | H5N8    | RBK_11     | 79,149    | 48,446,910      | 612              | 12.3              | IonXpress_093 | 426,540   | 134,969,178     | 316              | 27.0              |

**TABLE S2** Accessions numbers (ENA) of shard data under project accession PRJEB35098.

| Sample ID | Virus ID                               | Subtype | Sample Accession | Run Accession ONT | Run Accession Ion Torrent |
|-----------|----------------------------------------|---------|------------------|-------------------|---------------------------|
| R30-06    | A/duck/Germany/R30/2006                | H1N1    | ERS4226848       | ERR3822170        | ERR3822188                |
| R3111-07  | A/duck/Germany/R3111/2007              | H2N9    | ERS4226849       | ERR3822171        | ERR3822189                |
| R2555-06  | A/duck/Germany/R2555/2006              | H3N1    | ERS4226850       | ERR3822172        | ERR3822190                |
| HAIV-81   | A/unknown/unknown/HAIV/1981            | H4N6    | ERS4226851       | ERR3822173        | ERR3822191                |
| R1612-08  | A/turkey/Germany//R1612/2008           | H5N3    | ERS4226852       | ERR3822174        | ERR3822192                |
| R617-07   | A/turkey/Germany/R617/2007             | H6N2    | ERS4226853       | ERR3822175        | ERR3822193                |
| R11-01    | A/turkey/Germany/R11/2007              | H7N7    | ERS4226854       | ERR3822176        | ERR3822194                |
| R249-08   | A/avian/Germany/R249/2008              | H9N2    | ERS4226855       | ERR3822177        | ERR3822195                |
| WV1677-03 | A/mallard/Germany/WV1677/2003          | H10N4   | ERS4226856       | ERR3822178        | ERR3822196                |
| R2675-06  | A/dunnoek/Germany/R2675/2006           | H11N6   | ERS4226857       | ERR3822179        | ERR3822197                |
| R2613-06  | A/black-headed gull/Germany/R2613/2006 | H13N8   | ERS4226858       | ERR3822180        | ERR3822198                |
| Se-99     | A/black-headed gull/Sweden/5/1999      | H16N3   | ERS4226859       | ERR3822181        | ERR3822199                |
| FM-47     | A/Fort Mammoth/1/47                    | H1N1    | ERS4226860       | ERR3822182        | NA                        |
| R1541-07  | A/Niedersachsen/14/07                  | H1N1    | ERS4226861       | ERR3822183        | NA                        |
| H1N1-swI  | A/Regensburg/D6/09                     | H1pdmN1 | ERS4226862       | ERR3822184        | NA                        |
| AR3343-17 | A/Michigan/45/2015                     | H1pdmN1 | ERS4226863       | ERR3822185        | NA                        |
| AR780-17  | A/turkey/Germany/AR780/2017            | H5N5    | ERS4226864       | ERR3822186        | NA                        |
| AR1384-17 | A/chicken/Germany/AR1384/2017          | H5N8    | ERS4226865       | ERR3822187        | NA                        |

**FIGURE S1** Read quality versus read length of MinION data using Nanoplot.

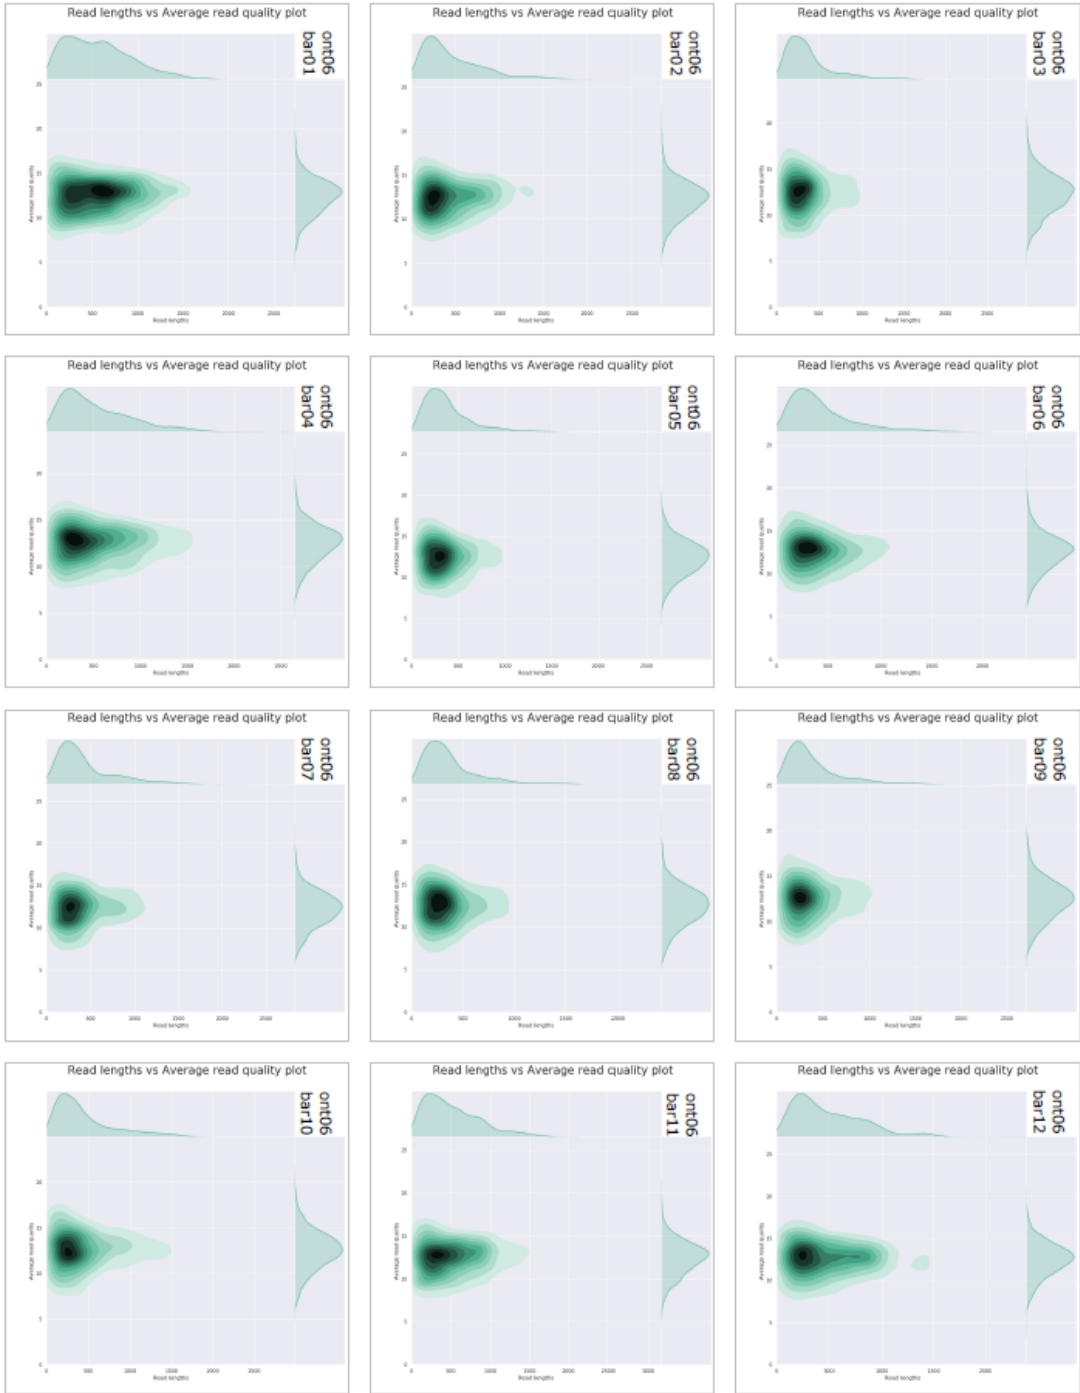

Supplement: MOESM1 [file 18345572]
